# Supplementary material for: A study of the heterochronic sense/antisense RNA representation in florets of sexual and apomictic Paspalum notatum
Source: PubMed Central journal article supplement (PMC7962388; doi:10.1186/s12864-021-07450-3), 2021-03-16
Supplement: 12864_2021_7450_MOESM4_ESM.pdf [file 12864_2021_7450_MOESM4_ESM.pdf]

**Sense Transcripts**

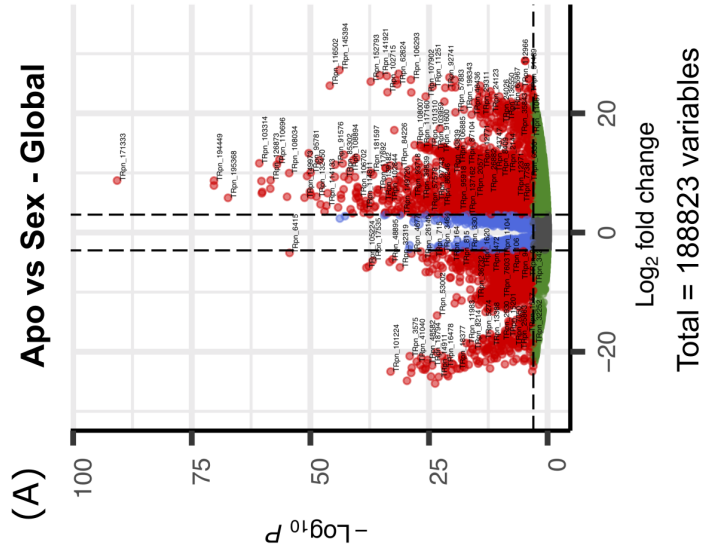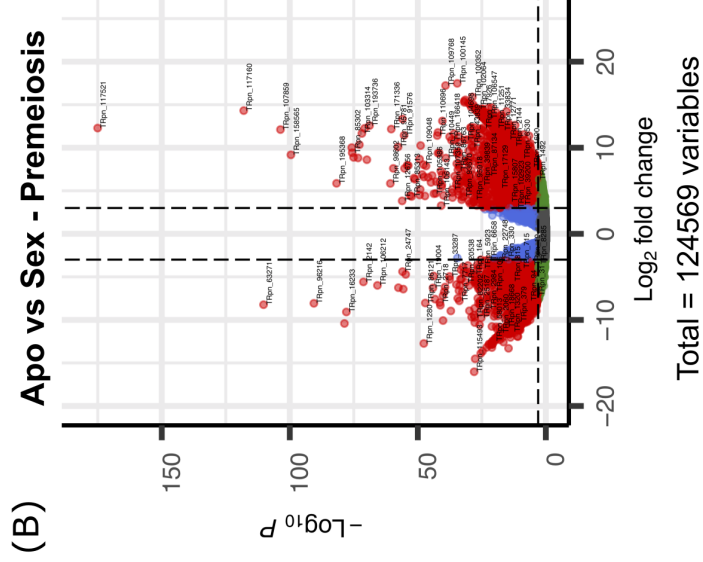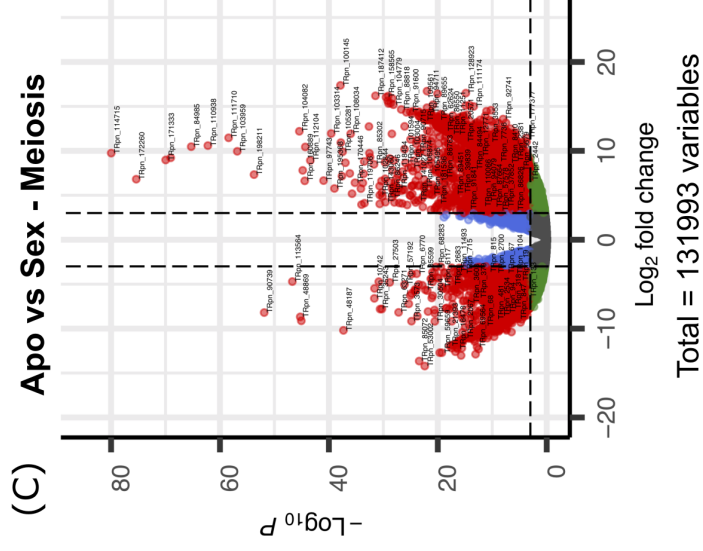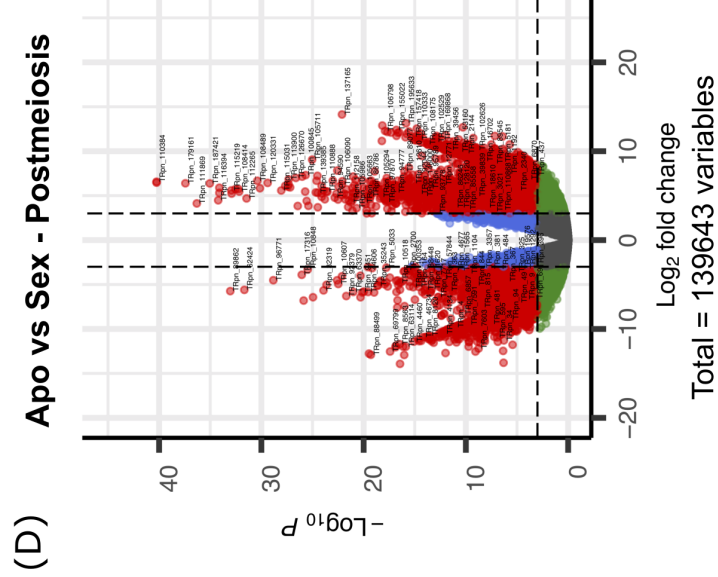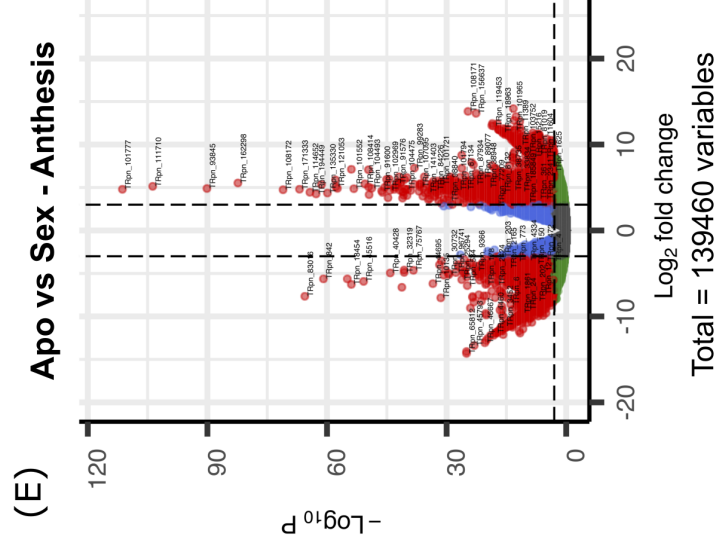

**Reference**

- Non-significant
- Log<sub>2</sub> FC
- p-adjust
- p-adjust < 0.001 & Log<sub>2</sub>FC > |3|
