# Supplementary material for: A study of the heterochronic sense/antisense RNA representation in florets of sexual and apomictic Paspalum notatum
Source: PubMed Central journal article supplement (PMC7962388; doi:10.1186/s12864-021-07450-3), 2021-03-16
Supplement: 12864_2021_7450_MOESM7_ESM.pdf [file 12864_2021_7450_MOESM7_ESM.pdf]

**Antisense Transcripts**

**(A) Apo vs Sex - Global**

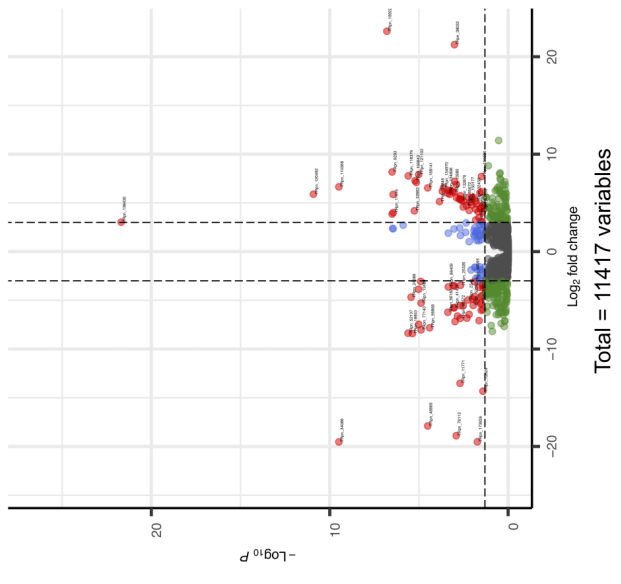

**(B) Apo vs Sex - Premeiosis**

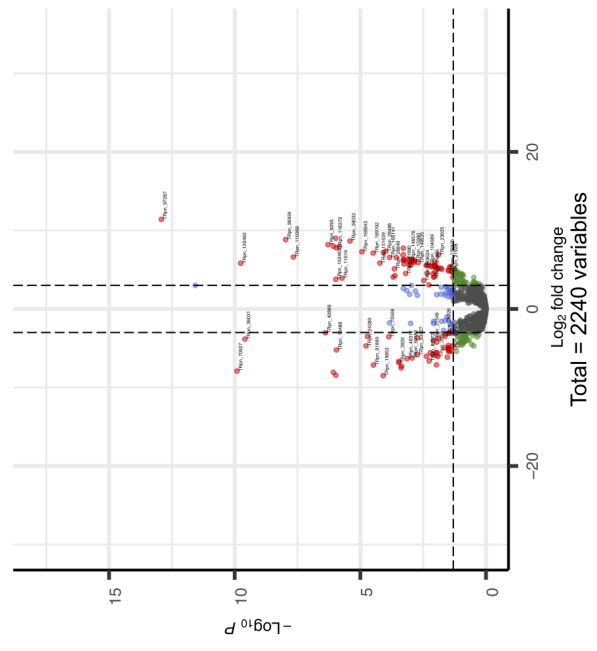

**(C) Apo vs Sex - Meiosis**

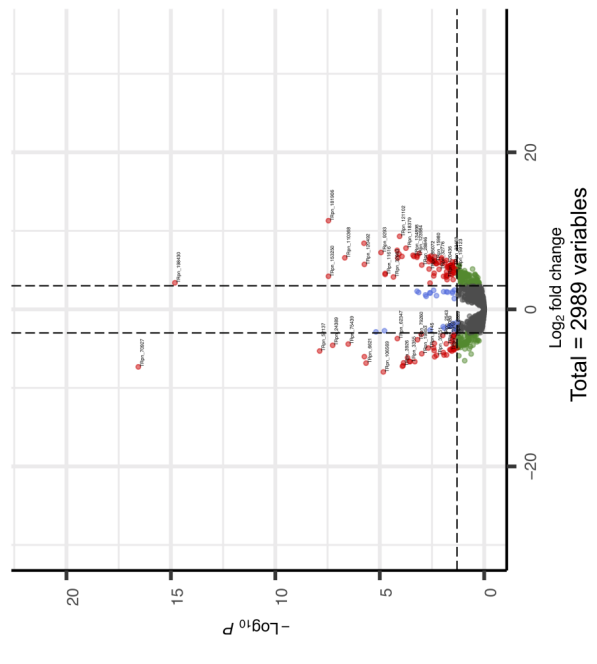

**(D) Apo vs Sex - Postmeiosis**

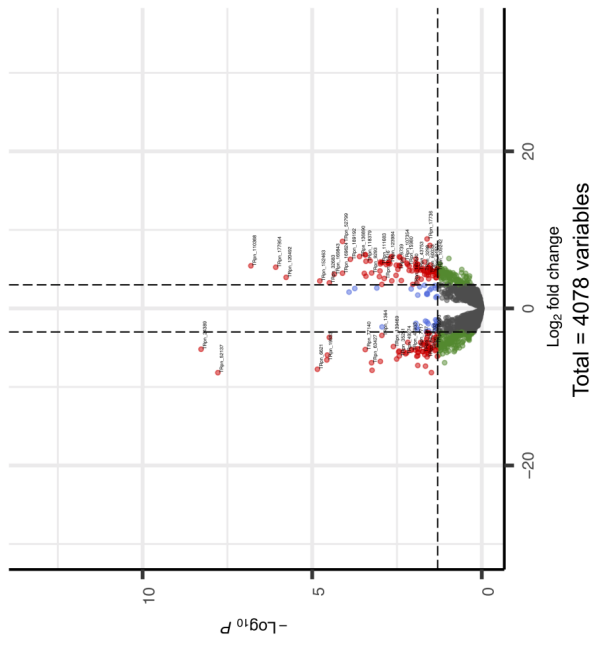

**(E) Apo vs Sex - Anthesis**

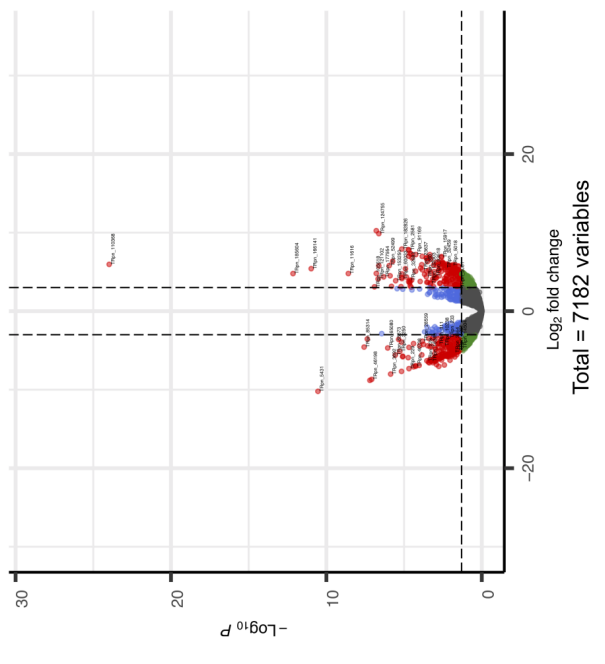

- Reference**
- Non-significant
  - Log<sub>2</sub> FC
  - p-adjust
  - p-adjust < 0.05 & Log<sub>2</sub>FC > |3|
