# Supplementary material for: A study of the heterochronic sense/antisense RNA representation in florets of sexual and apomictic Paspalum notatum
Source: PubMed Central journal article supplement (PMC7962388; doi:10.1186/s12864-021-07450-3), 2021-03-16

(A)

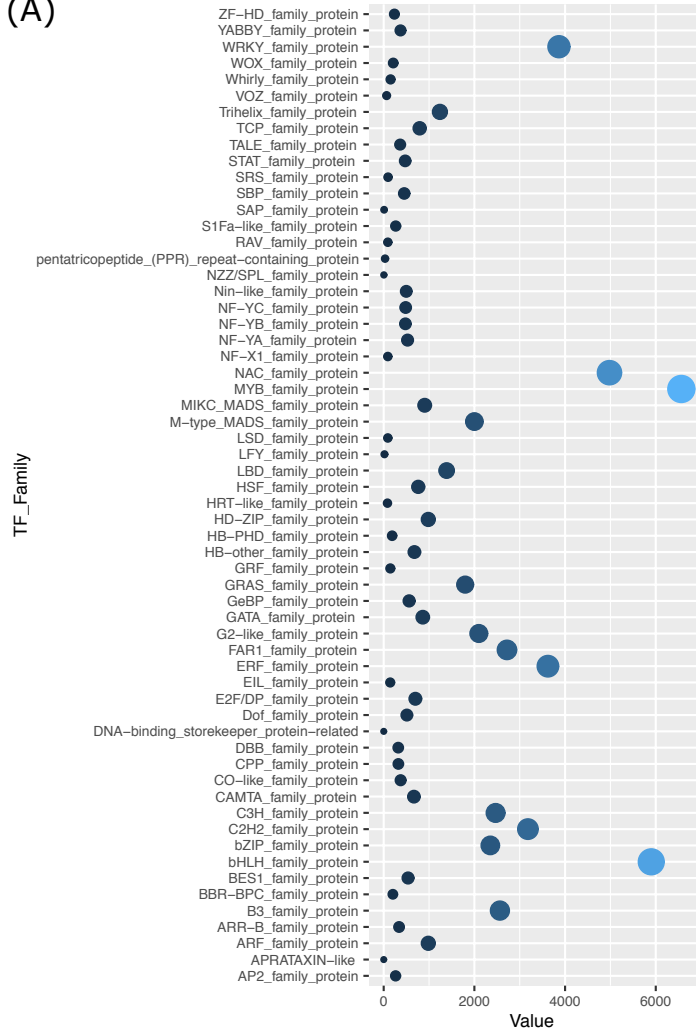

(B)

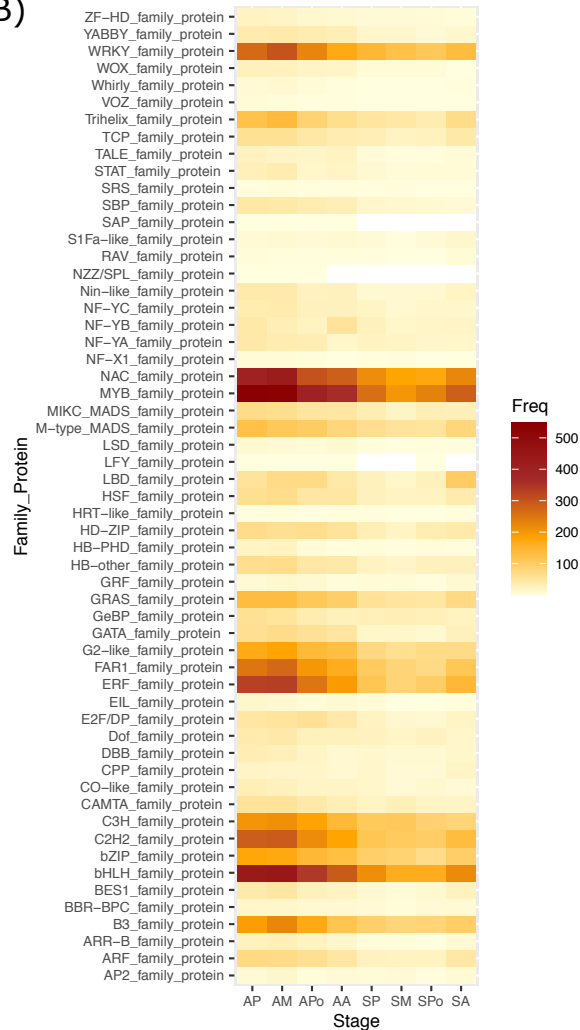

Supplement: 12864_2021_7450_MOESM14_ESM.pdf [file 12864_2021_7450_MOESM14_ESM.pdf]
